# Supplementary material
Source: Frontiers journal article supplement (https://www.frontiersin.org/articles/479715)
Supplement: Data_Sheet_1.PDF [file Data_Sheet_1.PDF]

Table S1: Abridged unit descriptions in the San Luis Caldera Complex\*

| Abbreviation                | Description                                                                                                                                                                                                                                                                                                                                                                                                                                  |
|-----------------------------|----------------------------------------------------------------------------------------------------------------------------------------------------------------------------------------------------------------------------------------------------------------------------------------------------------------------------------------------------------------------------------------------------------------------------------------------|
| <u>Nelson Mountain Tuff</u> |                                                                                                                                                                                                                                                                                                                                                                                                                                              |
| <i>Tndn</i>                 | Nonwelded to partly-welded dacite: yellow-tan to gray, porous, grades down into more welded dacitic NMT ( <i>Tnd</i> ). Crystal rich with phenocrysts similar to welded dacite ( <i>Tnde</i> ). 10-50 m thickness.                                                                                                                                                                                                                           |
| <i>Tnde</i>                 | Welded mafic dacite (Equity facies): Dacite and mafic dacite in a welded zone with dense dark-gray devitrified tuff comprising most of the intracaldera NMT (63-66% SiO <sub>2</sub> ; 25-45% pl, incl. bi, cpx, sn, hbl, qz <sup>1</sup> ). Grades downward into silicic dacite tuff ( <i>Tnd</i> ). Thickness 20-50 m in outflow; within caldera, thickness varies from <200 m in the south to >1,200 m in the north with no base exposed. |
| <i>Tnd</i>                  | Welded silicic dacite and transitional rhyolite-dacite: Brownish-gray main cliff-forming welded caprock of the outflow NMT (67-72% SiO <sub>2</sub> , 15-25 % pl, incl. sn, bi, cpx, qz), commonly with a blank vitrophyre (3-5 m) near the base. Grades downward into rhyolite ( <i>Tnr</i> ). Thickness 20-50 m in outflow, not mapped separately within caldera.                                                                          |
| <i>Tnr</i>                  | Welded to partly welded rhyolite: light gray and tan to light reddish-brown welded tuff (71-74% SiO <sub>2</sub> , 5-15% pl incl. sn, bi, cpx). Includes dark-gray pumice fiamme with <10:1 flattening ratio are commonly set in orange-brown devitrified matrix. Grades into less welded tuff ( <i>Tnn</i> ). Thickness 0-200 m.                                                                                                            |
| <i>Tnn</i>                  | Nonwelded to partly welded rhyolite and silicic dacite: gray porous pumiceous tuff containing common small angular fragments of andesitic lava. Mostly argilized or zeolitized. Contains 5-10% pl incl. sn and bi. Thickness 10-250 m.                                                                                                                                                                                                       |
| <u>Cebolla Creek Tuff</u>   |                                                                                                                                                                                                                                                                                                                                                                                                                                              |
| <i>Tcc</i>                  | Partly-welded mafic dacite: dark gray massive intracaldera tuff (62-66% SiO <sub>2</sub> , 25-40% pl, incl. bi, hbl). Contains orange-brown to blank pumice fragments (2-5 cm across) and 1-3 cm andesitic lithics. Blank vitrophyre near base of most welded sections; total thickness 25-50 m.                                                                                                                                             |
| <u>Rat Creek Tuff</u>       |                                                                                                                                                                                                                                                                                                                                                                                                                                              |
| <i>Trd</i>                  | Welded dacite tuff: light brown devitrified upper part of the proximal RCT (65-70% SiO <sub>2</sub> , 20-35% pl, incl. bi, sn, cpx). Grades downward into rhyolitic tuff ( <i>Trr</i> ).                                                                                                                                                                                                                                                     |
| <i>Trr</i>                  | Nonwelded to partly welded rhyolite tuff: poorly exposed light gray to yellow glassy pumiceous tuff (70-73% SiO <sub>2</sub> , 5-20% pl, incl. sn, bi, cpx) commonly containing small andesitic fragments. Typically glassy or argilized/zeolitized.                                                                                                                                                                                         |
| <i>Trrf</i>                 | Light-colored, crystal-poor rhyolitic pumice of the Rat Creek Tuff from Los Pinos Pass                                                                                                                                                                                                                                                                                                                                                       |
| <i>Trrm</i>                 | Dark-colored, crystal-poor rhyolitic pumice of the Rat Creek Tuff from Los Pinos Pass                                                                                                                                                                                                                                                                                                                                                        |
| <i>Trrg</i>                 | Mingled, crystal-poor rhyolitic pumice of the Rat Creek Tuff from Los Pinos Pass                                                                                                                                                                                                                                                                                                                                                             |

\*for complete list of San Luis units and descriptions, see Lipman (2006) *Geologic map of the central San Juan caldera cluster, southwestern Colorado*. US Department of the Interior, US Geological Survey.

<sup>1</sup>pl = plagioclase; bi = biotite; cpx = clinopyroxene; sn = sanidine; hbl = hornblende; qz = quartz

Table S2: Brief Sample Descriptions

| Sample                          | Mapped Unit | Latitude  | Longitude  | Locality, notes         | Description                                                                                                                                                                                                                                                                                           |
|---------------------------------|-------------|-----------|------------|-------------------------|-------------------------------------------------------------------------------------------------------------------------------------------------------------------------------------------------------------------------------------------------------------------------------------------------------|
| <u>Nelson Mountain Dacite</u>   |             |           |            |                         |                                                                                                                                                                                                                                                                                                       |
| 17SJ02                          | <i>Tndn</i> | 37°51'01" | 107°08'58" | North Clear Creek Falls | Welded dark to tan bulk tuff; very crystal-rich with plag, bt, cpx                                                                                                                                                                                                                                    |
| 17SJ18                          | <i>Tnde</i> | 37°55'59" | 106°57'33" | Equity Mine             | Welded intracaldera bulk tuff; crystal-rich with abundant plag                                                                                                                                                                                                                                        |
| 17SJ03                          | <i>Tnd</i>  | 37°51'01" | 107°08'58" | North Clear Creek Falls | Slightly welded white to gray bulk tuff; very crystal rich with plag, bt, cpx, similar to CCT                                                                                                                                                                                                         |
| NMT14-1                         | <i>Tnd</i>  | 37°50'55" | 106°08'50" | North Clear Creek Falls | Slightly welded white to gray bulk tuff; very crystal rich with plag, bt, cpx                                                                                                                                                                                                                         |
| 17SJ09                          | <i>Tnd</i>  | 37°54'52" | 106°56'06" | Nelson Mountain         | Welded dark burgundy bulk tuff; crystal rich                                                                                                                                                                                                                                                          |
| NMT08-2                         | <i>Tnd</i>  | 37°52'49" | 106°46'01" | Wheeler Monument        | Slightly welded white to gray bulk tuff; very crystal rich with plag, bt, cpx                                                                                                                                                                                                                         |
| <u>Nelson Mountain Rhyolite</u> |             |           |            |                         |                                                                                                                                                                                                                                                                                                       |
| 17SJ17                          | <i>Tnr</i>  | 37°54'28" | 106°57'21" | Equity Mine             | Welded intracaldera bulk tuff; crystal-rich                                                                                                                                                                                                                                                           |
| 17SJ04                          | <i>Tnn</i>  | 37°49'01" | 107°08'04" | Bristol Head            | White pumiceous tuff, crystal-poor                                                                                                                                                                                                                                                                    |
| NMT14-2                         | <i>Tnn</i>  | 37°49'01" | 107°08'04" | Bristol Head            | White pumiceous tuff, crystal-poor                                                                                                                                                                                                                                                                    |
| 17SJ16                          | <i>Tnn</i>  | 38°04'35" | 107°00'24" | Powderhorn Park         | White non-welded slightly altered bulk tuff, crystal-poor                                                                                                                                                                                                                                             |
| 17SJ19                          | <i>Tnn</i>  | 38°04'53" | 107°05'02" | Powderhorn Park         | White to gray non-welded bulk tuff, crystal-poor                                                                                                                                                                                                                                                      |
| NMT08-1                         | <i>Tnn</i>  | 37°52'49" | 106°46'01" | Wheeler Monument        | Pumice fragment from bulk <i>Tnn</i>                                                                                                                                                                                                                                                                  |
| <u>Cebolla Creek Tuff</u>       |             |           |            |                         |                                                                                                                                                                                                                                                                                                       |
| SRM07                           | <i>Tcc</i>  | 38°05'47" | 106°59'04" | Los Pinos Pass          | White to gray slightly welded bulk tuff, very crystal-rich                                                                                                                                                                                                                                            |
| <u>Rat Creek Dacite</u>         |             |           |            |                         |                                                                                                                                                                                                                                                                                                       |
| RCT14-1                         | <i>Trd</i>  | 37°54'41" | 106°58'58" | Rat Creek               | Upper welded RCT dacite, very crystal-rich<br>Highest RCTD sample location in sequence, massive, welded with glassy matrix (even darker than DF12), many small (mm-cm) whitish (peach colored weathered) pumices, also darker bigger pumices, some mm-cm sized lithics, small ~cm-long fiamme present |
| 17DF13                          | <i>Trd</i>  | 38°04'55" | 107°00'07" | Cathedral Creek         | Second highest RCTD sample location in sequence, massive, welded dacite, darker matrix -> glassy; whitish-peach colored weathered pumices, small elongated bigger brownish pumices, some weathered/altered to zeolite, some mm-sized lithics, ~cm-long fiamme                                         |
| 17DF12                          | <i>Trd</i>  | 38°04'53" | 107°00'08" | Cathedral Creek         | Reworked RCTR with dacitic clasts and lithic fragments with various size (up to dm-sized); porous matrix, yellowish pumices (zeolith) dacitic clasts -> purplish color, yellowish matrix -> Rhyolite                                                                                                  |
| 17DF09                          | <i>Trd</i>  | 38°04'50" | 107°00'05" | Cathedral Creek         |                                                                                                                                                                                                                                                                                                       |
| <u>Rat Creek Rhyolite</u>       |             |           |            |                         |                                                                                                                                                                                                                                                                                                       |
| 17DF11                          | <i>Trr</i>  | 38°04'51" | 107°00'06" | Cathedral Creek         | Highest RCTR sample location in sequence, purple/greyish matrix, dense massive rock with some holes (left from pumices maybe)-> welded dacite; white pumices, some weathered with peach color (mm-cm size),                                                                                           |

some strongly weathered to zeolite (yellow color), brownish pumices, less than white ones (cm size); maybe "fluidal" structures, aligned elongated pumices = fiamme structures -> elongated, flattened pumices  
 Second highest RCTR sample location in sequence, whitish/pinkish matrix, solid but easy to crumble -> non-welded, white pumices mm-cm size, some lithic fragments in mm-size  
 Porous, fine-grained grey-whitish matrix with white pumices mm-cm size, some lithics mm size  
 Very porous and weathered, small white pumices present, lots of ~mm-sized lithic fragments, fine-grained whitish matrix; small scale: no layering, homogeneous distribution, large scale: kind of layers visible by color variations  
 Second highest RCTR sample location in Cathedral sequence; for bulk rock, pinkish matrix, slightly friable, ashy matrix, non-welded, cm-sized white pumices & grey-brownish pumices and lithics  
 Slightly weathered bulk tuff, white and black pumices (up to cm size) and peach colored (weathered), nearly no lithic fragments, pinkish ground mass; plag, qtz and bt phenocrysts visible  
 Non-welded bulk tuff, few small (<1 cm) white pumices present

|        |            |           |            |                  |
|--------|------------|-----------|------------|------------------|
| 17DF10 | <i>Trr</i> | 38°04'50" | 107°00'05" | Cathedral Creek  |
| 17DF08 | <i>Trr</i> | 38°04'50" | 107°00'05" | Cathedral Creek  |
| 17DF06 | <i>Trr</i> | 38°03'47" | 107°04'30" | Powderhorn Park  |
| 17DF15 | <i>Trr</i> | 38°07'44" | 106°56'22" | Los Pinos Creek  |
| 17DF01 | <i>Trr</i> | 37°52'43" | 106°47'07" | Wheeler Monument |
| 17DF21 | <i>Trr</i> | 37°51'17" | 107°05'48" | Point Bennett    |

*Rat Creek Pumice\**

|          |             |          |            |                 |                                                                                  |
|----------|-------------|----------|------------|-----------------|----------------------------------------------------------------------------------|
| 17DF18   | <i>Trrg</i> | 38°4'44" | 106°56'22" | Los Pinos Creek | Mingled pumice from Los Pinos Creek, brownish and whitish bands                  |
| 15SJ14   | <i>Trrg</i> | 38°4'44" | 106°56'22" | Los Pinos Creek | Mingled pumice from Los Pinos Creek, mixed brownish and whitish pumices together |
| 17DF20-1 | <i>Trrf</i> | 38°4'44" | 106°56'22" | Los Pinos Creek | White pumices in various size from RCTR; crystal-poor (predominantly plag)       |
| 17DF20-2 | <i>Trrf</i> | 38°4'44" | 106°56'22" | Los Pinos Creek | White pumices in various size from RCTR; crystal-poor (predominantly plag)       |
| 17DF20-3 | <i>Trrf</i> | 38°4'44" | 106°56'22" | Los Pinos Creek | White pumices in various size from RCTR; crystal-poor (predominantly plag)       |
| 17DF19-1 | <i>Trrm</i> | 38°4'44" | 106°56'22" | Los Pinos Creek | Dark pumices in various size from RCTR; crystal-poor (predominantly plag)        |
| 17DF19-2 | <i>Trrm</i> | 38°4'44" | 106°56'22" | Los Pinos Creek | Dark pumices in various size from RCTR; crystal-poor (predominantly plag)        |
| 17DF19-3 | <i>Trrm</i> | 38°4'44" | 106°56'22" | Los Pinos Creek | Dark pumices in various size from RCTR; crystal-poor (predominantly plag)        |

Table S3: LA-ICP-MS analytical parameters for trace element and U-Pb dating

| <b>Laboratory &amp; Sample Preparation</b>             |                                                                                              |
|--------------------------------------------------------|----------------------------------------------------------------------------------------------|
| Laboratory name                                        | Dept. of Earth Science, ETH Zurich                                                           |
| Sample type/mineral                                    | Zircon; silicate minerals                                                                    |
| Sample preparation                                     | Conventional mineral separation, 1-in resin mount, 1 µm polish                               |
| <b>Laser ablation system</b>                           |                                                                                              |
| Make, model & type                                     | ASI Resolution                                                                               |
| Ablation cell & volume                                 | Laurin Technic 155, constant geometry, aerosol dispersion volume < 1 cm <sup>3</sup>         |
| Laser wavelength                                       | 193 nm                                                                                       |
| Pulse width                                            | 25 ns                                                                                        |
| Energy density / Fluence                               | 2.5-3.5 J cm <sup>-2</sup>                                                                   |
| Repetition rate                                        | 5 Hz                                                                                         |
| Spot size                                              | 29 µm                                                                                        |
| Ablation rate                                          | ~75 nm pulse <sup>-1</sup>                                                                   |
| Sampling mode / pattern                                | Single hole drilling, 3 cleaning pulses                                                      |
| Carrier gas and flow                                   | 100% He, 0.7 l/min                                                                           |
| Ablation duration                                      | 40 s                                                                                         |
| <b>ICP-MS Instrument</b>                               |                                                                                              |
| Make, model & type                                     | Thermo Element XR SF-ICP-MS                                                                  |
| Sample introduction                                    | Ablation aerosol only, squid-like aerosol homogenization device                              |
| RF power                                               | 1550 W                                                                                       |
| Make-up gas flow                                       | ~0.95 L/min Ar (gas mixed to He carrier inside ablation cell funnel)                         |
| Detection system                                       | Single detector triple mode SEM, analogue, Faraday                                           |
| Masses measured (U-Pb)                                 | 202, 204, 206, 207, 208, 232, 235, 238 amu                                                   |
| Integration time per peak (mass)                       | 10 ms (202, 204, 208, 232, 235), 20 ms (238), 75 ms (206, 207);                              |
| Integration time per reading                           | 0.25 s                                                                                       |
| Dead time                                              | 20 ns                                                                                        |
| Typical oxide rate (ThO/Th)                            | 0.18%                                                                                        |
| Typical (++) rate (Ba <sup>++</sup> /Ba <sup>+</sup> ) | 3.50%                                                                                        |
| <b>Data Processing</b>                                 |                                                                                              |
| Gas blank                                              | 30 s prior to each ablation spot                                                             |
| Calibration strategy                                   | GJ-1 (U-Pb) and NIST612 (TE) used as calibration ref. materials; bracketing 2 per 20 samples |
| Reference material information                         | 601.86 ± 0.37 Ma; U = 312 and Th = 10.8 ppm; Horstwood et al., 2016                          |
| Data processing package used                           | Iolite v2.5 using VizualAge                                                                  |
| Mass discrimination                                    | Mass bias correction for all ratios normalized to calibration reference material             |
| Uncertainty level & propagation                        | Ages are quoted at 2s absolute. Propagation is by quadratic addition.                        |
| Validation reference materials                         | GSD-1G (TE); Temora2, 91500, Plesovice, OD-3 (U-Pb)                                          |
